# Supplementary material for: Interface-acting nucleotide controls polymerization dynamics at microtubule plus- and minus-ends
Source: eLife. 2024 Jan 5;12:RP89231. doi: 10.7554/eLife.89231 (PMC10945504; doi:10.7554/eLife.89231)
Supplement: Figure 1—source data 1. [file elife-89231-fig1-data1.xlsx]

## Sheet: Fig 1B
	Plus-end self-acting			Minus-end
% GDP-tubulin (1.25 µM Total)	Growth Rate (mean) (nm/s)	Growth Rate (std) (nm/s)	Simulations (n)	Growth Rate (mean) (nm/s)	Growth Rate (std) (nm/s)	Simulations (n)
0	1.67234	0.084796	50	1.68032	0.096666	50
5	1.53791	0.076269	50	1.553	0.093568	50
10	1.40961	0.080293	50	1.40661	0.077306	50
15	1.31112	0.079622	50	1.28659	0.069626	50
20	1.18446	0.067172	50	1.17482	0.078772	50

## Sheet: Fig 1C
	Plus-end interface-acting			Minus-End
% GDP-tubulin	Growth Rate (mean) (nm/s)	Growth Rate (std) (nm/s)	Simulations (n)	Growth Rate (mean) (nm/s)	Growth Rate (std) (nm/s)	Simulations (n)
0	1.66497	0.094117	50	1.68032	0.096666	50
5	0.985672	0.16965	50	1.553	0.093568	50
10	0.624015	0.168287	50	1.40661	0.077306	50
15	0.337057	0.1643	50	1.28659	0.069626	50
20	0.218816	0.093916	50	1.17482	0.078772	50

## Sheet: Fig 1 Supp 3A
GDP Weakening	Minus-end			Plus-end
%GDP (1 μM)	30000 fold weaker (minus)	3000 fold weaker (minus)	300 fold weaker (minus)	30000 fold weaker (plus)	3000 fold weaker (plus)	300 fold weaker (plus)	Simulations (n)
0	1	1	1	0.993792	1.02054	1.00608	50
5	1	1	1	0.478326	0.641373	0.802479	50
10	1	1	1	0.211675	0.362707	0.631197	50
15	1	1	1	0.152955	0.257624	0.492212	50
20	1	1	1	0.116569	0.196872	0.388642	50

## Sheet: Fig 1 Supp 3B
KD Long	Minus-end			Plus-end
%GDP (1 μM)	1 mM (minus)	100 μM (minus)	10 μM (minus)	1 mM (plus)	100 μM (plus)	10 μM (plus)	Simulations (n)
0	1	1	1	0.98473	1.0068	1.00651	50
5	1	1	1	0.458162	0.628703	0.650594	50
10	1	1	1	0.232461	0.384434	0.412928	50
15	1	1	1	0.160055	0.245986	0.279578	50
20	1	1	1	0.113401	0.185782	0.206506	50

## Sheet: Fig 1 Supp 3C
KD Corner	Minus-end			Plus-end
%GDP (1 μM)	500 nM (minus)	100 nM (minus)	20 nM (minus)	500 nM (plus)	100 nM (plus)	20 nM (plus)	Simulations (n)
0	1	1	1	0.998588	0.982558	0.995106	50
5	1	1	1	0.448604	0.636688	0.72858	50
10	1	1	1	0.285011	0.420273	0.5096	50
15	1	1	1	0.181569	0.276296	0.347844	50
20	1	1	1	0.162036	0.180733	0.242205	50
