# Supplementary material for: Interface-acting nucleotide controls polymerization dynamics at microtubule plus- and minus-ends
Source: eLife. 2024 Jan 5;12:RP89231. doi: 10.7554/eLife.89231 (PMC10945504; doi:10.7554/eLife.89231)
Supplement: Figure 2—source data 1. [file elife-89231-fig2-data1.xlsx]

## Sheet: Figure 2
Figure 2B
Tubulin Concentration [μM]	Plus-End Growth Rate (nm/s)	Minus-End Growth Rate (nm/s)	Plus-End Growth Rate SEM (nm/s)	Minus-End Growth Rate SEM (nm/s)	Plus-End Growth Rate STD (nm/s)	Minus-End Growth Rate STD (nm/s)	Plus-End Growth Rate Weight	Minus-End Growth Rate Weight
1	1.73739	0.869691	0.0293288	0.0326276	0.265584	0.250617	34.0961	30.6489
1.25	2.21662	1.02447	0.0269545	0.0302708	0.2965	0.293486	37.0995	33.0351
1.5	2.51906	1.2179	0.0340819	0.0365378	0.312366	0.292974	29.341	27.3689
0.75	1.20913	0.550186	0.0227998	0.0374542	0.182399	0.233902	43.86	26.6993
Figure 2C @ 1.25 μM Tubulin
GDP [μM]	GMPCPP [μM]	Plus-End Growth Rate (nm/s)	Minus-End Growth Rate (nm/s)	Plus-End Growth Rate SEM (nm/s)	Minus-End Growth Rate SEM (nm/s)	Plus-End Growth Rate STD (nm/s)	Minus-End Growth Rate STD (nm/s)	Plus-End Growth Rate Weight	Minus-End Growth Rate Weight
0	1000	2.21662	1.02447	0.0269545	0.0302708	0.2965	0.293486	37.0995	33.0351
10	990	2.20896	1.18269	0.0278693	0.0304088	0.281467	0.288483	35.8817	32.8852
25	975	1.09754	0.73189	0.0156164	0.0375816	0.127826	0.249288	64.0352	26.6087
50	950	1.01612	0.707329	0.0140428	0.0351986	0.121615	0.285955	71.2107	28.4102
100	900	0.552623	0.383644	0.00752217	0.0203301	0.0611104	0.157477	132.94	49.188
250	750	0.171685	0.109089	0.00369932	0.0062269	0.0341061	0.0494245	270.32	160.594

## Sheet: Figure 2 - Normalized
GDP [μM]	GMPCPP [μM]	Plus-End Growth Rate - Normalized	Minus-End Growth Rate - Normalized	Normalized Plus-End Growth Rate SEM	Normalized Minus-End Growth Rate SEM	Normalized Plus-End Growth Rate STD	Minus-End Growth Rate STD	Normalized Plus-End Growth Rate Weight	Normalized Minus-End Growth Rate Weight
0	1000	1	1	0.0121602	0.0295477	0.133762	0.286475	82.2357	33.8436
10	990	0.996542	1.15444	0.0126165	0.0296824	0.0125729	0.281592	79.2613	33.69
25	975	0.495139	0.714406	0.00704514	0.0368412	0.0576669	0.244377	141.942	27.1435
50	950	1.42648	1.65087	0.00633524	0.0343578	0.0548648	0.279124	157.847	29.1055
100	900	1.21623	0.374479	0.00339353	0.0198445	0.0275691	0.153715	294.679	50.3918
250	750	0.0774536	1.07408	0.0016689	0.00607814	0.0153865	0.0482438	599.197	164.524
Statistics for 2C
GDP [μM]	Two-Sided t-test with Unequal Variance (p-values)
0	1
10	3.41e-05
25	5.63e-07
50	7.81e-09
100	5.7e-08
250	1.99e-05
