# Supplementary material for: Interface-acting nucleotide controls polymerization dynamics at microtubule plus- and minus-ends
Source: eLife. 2024 Jan 5;12:RP89231. doi: 10.7554/eLife.89231 (PMC10945504; doi:10.7554/eLife.89231)
Supplement: Figure 3—source data 1. [file elife-89231-fig3-data1.xlsx]

## Sheet: Figure 3
Figure 3B
GDP [μM]	Minus-End Growth Rate (nm/s)	Minus-End Growth Rate SEM (nm/s)	Minus-End Growth Rate STD (nm/s)	Minus-End Growth Rate Weight
0	1.02447	0.0302708	0.293486	33.0351
10	1.18269	0.0304088	0.288483	32.8852
25	0.73189	0.0375816	0.249288	26.6087
50	0.707329	0.0351986	0.285955	28.4102
100	0.383644	0.0203301	0.157477	49.188
250	0.109089	0.0062269	0.0494245	160.594
Figure 3C
GDP-tubulin [μM]	GMPCPP-tubulin [μM]	Minus-End Growth Rate (nm/s)	Minus-End Growth Rate SEM (nm/s)	Minus-End Growth Rate STD (nm/s)	Minus-End Growth Rate Weight
0.00482877	1.24517	1.02447	0.0302708	0.293486	33.0351			1
0.1425	1.1075	1.18269	0.0304088	0.288483	32.8852			0.883333
0.303498	0.946502	0.73189	0.0375816	0.249288	26.6087			0.75
0.494302	0.755698	0.707329	0.0351986	0.285955	28.4102			0.591667
0.724031	0.525969	0.383644	0.0203301	0.157477	49.188			0.4
1.00595	0.244048	0.109089	0.0062269	0.0494245	160.594			0.158333
Figure 3D
GDP-tubulin [μM]	GMPCPP-tubulin [μM]	Plus-End Growth Rate (nm/s)	Plus-End Growth Rate SEM (nm/s)	Plus-End Growth Rate STD (nm/s)	Plus-End Growth Rate Weight
0.00482877	1.24517	2.21662	0.0269545	0.2965	37.0995
0.1425	1.1075	2.20896	0.0278693	0.281467	35.8817
0.303498	0.946502	1.09754	0.0156164	0.127826	64.0352
0.494302	0.755698	1.01612	0.0140428	0.121615	71.2107
0.724031	0.525969	0.552623	0.00752217	0.0611104	132.94
1.00595	0.244048	0.171685	0.00369932	0.0341061	270.32

## Sheet: Supplemental Figure 3
Supplemental Figure 3 A - 0.2 μM Tubulin
6-Thio GTP [μM]	BSA (a.u.) - Average	Tubulin (a.u) - Average	Relative_Fluorescence (Tubulin/BSA)	6Thio_Quench_SEM	6Thio_Quench_Weight
0	233.295	224.095	0.960564	0.0404061	24.7487
0.1	213.413	200.866	0.941206	0.0430324	23.2383
0.2	205.755	191.053	0.928548	0.0467791	21.3771
0.3	207.307	187.2	0.903008	0.0446044	22.4193
0.4	208.563	177.355	0.850366	0.0443125	22.567
0.6	218.45	192.681	0.882033	0.0381292	26.2266
0.8	219.537	166.057	0.756396	0.0535318	18.6805
1	221.176	189.261	0.855702	0.0430264	23.2416
2	198.013	152.158	0.768423	0.0350163	28.5581
4	182.405	129.656	0.710818	0.0616253	16.2271
6	177.307	129.68	0.731387	0.0377618	26.4818
8	175.008	125.282	0.715867	0.0380295	26.2953
Supplemental Figure 3 B - 0.2 μM Tubulin and 3 μM 6-Thio GTP
GDP [μM]	BSA (a.u.) - Average	Tubulin (a.u) - Average	Relative_Fluorescence (Tubulin/BSA)	GDP_Unquench_SEM	GDP_Unquench_Weight
0	226.19	179.265	0.79254	0.019249	51.9508
0.1	220.887	188.031	0.851254	0.0434508	23.0145
0.2	218.176	183.564	0.841354	0.0254512	39.2909
0.3	212.815	182.249	0.856373	0.03034	32.9598
0.4	218.262	180.464	0.826824	0.0239759	41.7085
0.6	216.815	183.337	0.845594	0.0256956	38.9171
0.8	214.92	181.345	0.843776	0.0278374	35.9228
1	214.957	176.078	0.81913	0.0808292	12.3718
2	218.884	192.245	0.878299	0.015083	66.2997
4	220.362	199.507	0.905359	0.0181758	55.0184
6	221.057	208.849	0.944771	0.0262626	38.0769
8	229.714	215.056	0.936188	0.02026	49.3584
Supplemental Figure 3 C - 0.2 μM Tubulin and 3 μM 6-Thio GTP
GMPCPP [μM]	BSA (a.u.) - Average	Tubulin (a.u) - Average	Relative_Fluorescence (Tubulin/BSA)	GMPCPP_Unquench_SEM	GMPCPP_Unquench_Weight
0	249.551	197.171	0.790105	0.0377232	26.5089
20	159.308	123.92	0.777863	0.22323	4.47969
40	131.116	116.309	0.88707	0.21537	4.64318
60	190.594	166.455	0.873348	0.12044	8.30286
80	231.811	205.159	0.885027	0.0339241	29.4776
100	228.043	203.039	0.890354	0.0368863	27.1103
120	227.053	200.721	0.884028	0.0367684	27.1973
140	227.508	203.49	0.894428	0.0305317	32.7529
160	221.919	205.368	0.925419	0.0408417	24.4848
180	221.183	202.393	0.91505	0.035844	27.8987
200	222.944	205.816	0.923175	0.0301426	33.1757
220	222.293	205.747	0.925567	0.0222586	44.9266
300	187.856	178.364	0.949472	0.0242375	41.2583
500	163.432	157.024	0.960793	0.0245611	40.7149
