# Supplementary material for: Interface-acting nucleotide controls polymerization dynamics at microtubule plus- and minus-ends
Source: eLife. 2024 Jan 5;12:RP89231. doi: 10.7554/eLife.89231 (PMC10945504; doi:10.7554/eLife.89231)
Supplement: Figure 4—source data 1. [file elife-89231-fig4-data1.xlsx]

## Sheet: Fig 4A
Plus-end			Minus-end
Growth Rate (mean) (nm/s)	Growth Rate (std) (nm/s)	Simulations (n)	Growth Rate (mean) (nm/s)	Growth Rate (std) (nm/s)	Simulations (n)
1.12161	0.083418	50	0.472771	0.044525	50
1.71074	0.099352	50	0.747066	0.07919	50
2.371	0.124393	50	1.0011	0.071058	50
3.05884	0.109238	50	1.29061	0.112657	50

## Sheet: Fig 4B
% GDP-tubulin (1.25 µM Total)	Growth Rate (mean) (nm/s)	Growth Rate (std) (nm/s)	Simulations (n)
0	1.00662	0.076058	50
5	0.944658	0.064384	50
10	0.886956	0.077061	50
15	0.804581	0.075315	50
20	0.73041	0.056524	50
25	0.672973	0.058155	50
30	0.600245	0.072413	50
35	0.545682	0.064504	50
40	0.498104	0.048787	50
45	0.43405	0.054717	50
50	0.375308	0.04532	50
55	0.310486	0.03316	50
60	0.270754	0.042231	50
65	0.224452	0.0297	50
70	0.178412	0.031515	50
75	0.136926	0.026268	50
80	0.094358	0.023593	50
85	0.070082	0.021019	50
90	0.035591	0.013793	50
95	0.009249	0.009396	50
100	-0.00462	0.002499	50

## Sheet: Fig 4C
% GDP-tubulin	Growth Rate (mean) (nm/s)	Growth Rate (std) (nm/s)	Simulations (n)
0	2.33966	0.116514	50
5	1.63085	0.170984	50
10	1.01449	0.158569	50
15	0.640142	0.144836	50
20	0.445065	0.143838	50
25	0.308204	0.099631	50
30	0.203582	0.079893	50
35	0.136664	0.065937	50
40	0.106592	0.069451	50
45	0.070329	0.045091	50
50	0.065335	0.054729	50
55	0.044145	0.070186	50
