# Supplementary material for: Interface-acting nucleotide controls polymerization dynamics at microtubule plus- and minus-ends
Source: eLife. 2024 Jan 5;12:RP89231. doi: 10.7554/eLife.89231 (PMC10945504; doi:10.7554/eLife.89231)
Supplement: Figure 5—source data 1. [file elife-89231-fig5-data1.xlsx]

## Sheet: Fig 5B
	Rate of Nucleotide Exchange (s-1)
	No Exchange (0 s-1)			0.01 s-1			0.05 s-1			0.1 s-1			0.3 s-1			0.5 s-1
% GDP-tubulin (1.25 µM Total)	Growth Rate (mean) (nm/s)	Growth Rate (std) (nm/s)	Simulations (n)	Growth Rate (mean) (nm/s)	Growth Rate (std) (nm/s)	Simulations (n)	Growth Rate (mean) (nm/s)	Growth Rate (std) (nm/s)	Simulations (n)	Growth Rate (mean) (nm/s)	Growth Rate (std) (nm/s)	Simulations (n)	Growth Rate (mean) (nm/s)	Growth Rate (std) (nm/s)	Simulations (n)	Growth Rate (mean) (nm/s)	Growth Rate (std) (nm/s)	Simulations (n)
0	2.36894	0.112893	50	2.37427	0.117176	50	2.38932	0.125457	50	2.33544	0.10826	50	2.38825	0.132936	50	2.36622	0.128658	50
5	1.60662	0.157154	50	1.70422	0.148988	50	1.83659	0.130344	50	1.93408	0.125228	50	2.10799	0.128141	50	2.16284	0.129095	50
10	1.02068	0.203489	50	1.19182	0.14781	50	1.4497	0.113166	50	1.60219	0.124458	50	1.84889	0.100608	50	1.95562	0.109352	50
15	0.6836	0.149088	50	0.829754	0.108773	50	1.1408	0.121732	50	1.34797	0.112179	50	1.64906	0.114836	50	1.73064	0.125667	50
20	0.447328	0.105622	50	0.609897	0.103265	50	0.930002	0.111036	50	1.12183	0.0919175	50	1.43472	0.0817511	50	1.57628	0.120529	50
25	0.312714	0.098438	50	0.492212	0.0950842	50	0.763069	0.0871094	50	0.964306	0.084644	50	1.27555	0.0957341	50	1.43351	0.11082	50
30	0.19569	0.0935817	50	0.373553	0.0625501	50	0.623932	0.0713847	50	0.795728	0.0767206	50	1.09949	0.0834256	50	1.21403	0.0825565	50
35	0.15611	0.0685417	50	0.286899	0.0591367	50	0.53128	0.0595367	50	0.680915	0.0750832	50	0.958764	0.0850266	50	1.08034	0.0888813	50
40	0.114405	0.067438	50	0.209766	0.0483401	50	0.447935	0.060285	50	0.582761	0.0630434	50	0.832938	0.0891501	50	0.966136	0.077956	50
45	0.0752432	0.0495946	50	0.198257	0.0535537	50	0.361264	0.0435758	50	0.501557	0.0461453	50	0.71641	0.0538885	50	0.838326	0.0653862	50
50	0.0635786	0.0484164	50	0.138142	0.0423102	50	0.313998	0.0432437	50	0.412457	0.0471281	50	0.626338	0.0666974	50	0.735514	0.0727563	50
55	0.0456753	0.0615071	50	0.116098	0.034847	50	0.26459	0.0509228	50	0.35324	0.0508046	50	0.521741	0.0529808	50	0.60428	0.0495319	50
60				0.0906519	0.0292868	50	0.210532	0.0399453	50	0.293717	0.051045	50	0.456668	0.052716	50	0.516708	0.0540415	50
65				0.0772352	0.0254441	50	0.16544	0.0400687	50	0.238157	0.0379958	50	0.363004	0.0397333	50	0.398755	0.0466516	50
70				0.0544962	0.0266557	50	0.138013	0.0337339	50	0.199555	0.0362652	50	0.284284	0.0481699	50	0.31612	0.0442293	50
75				0.0412794	0.0169988	50	0.108863	0.0203404	50	0.145105	0.0261888	50	0.219889	0.033575	50	0.250221	0.0347549	50
80				0.0302106	0.0126498	50	0.0817361	0.0270136	50	0.114498	0.0223432	50	0.160194	0.0291299	50	0.177817	0.0270585	50
85				0.0206803	0.0104178	50	0.0483702	0.0162812	50	0.0779865	0.0255537	50	0.10841	0.0213022	50	0.117183	0.0223092	50
90							0.0315781	0.0158938	50	0.0391974	0.0156466	50	0.0642161	0.0154515	50	0.0633742	0.0177682	50
95							0.0112306	0.00912987	50	0.0155979	0.0130783	50	0.0193506	0.0115238	50	0.0216504	0.0119317	50
100							-0.00259608	0.00485553	50	-0.00449553	0.00367786	50	-0.00769447	0.0200005	50	-0.00949627	0.00377597	50
